# Supplementary material
Source: MDPI journal article supplement (https://www.mdpi.com/2075-163X/11/12/1316)
Supplement: s1 [file s1]

## Supplementary information

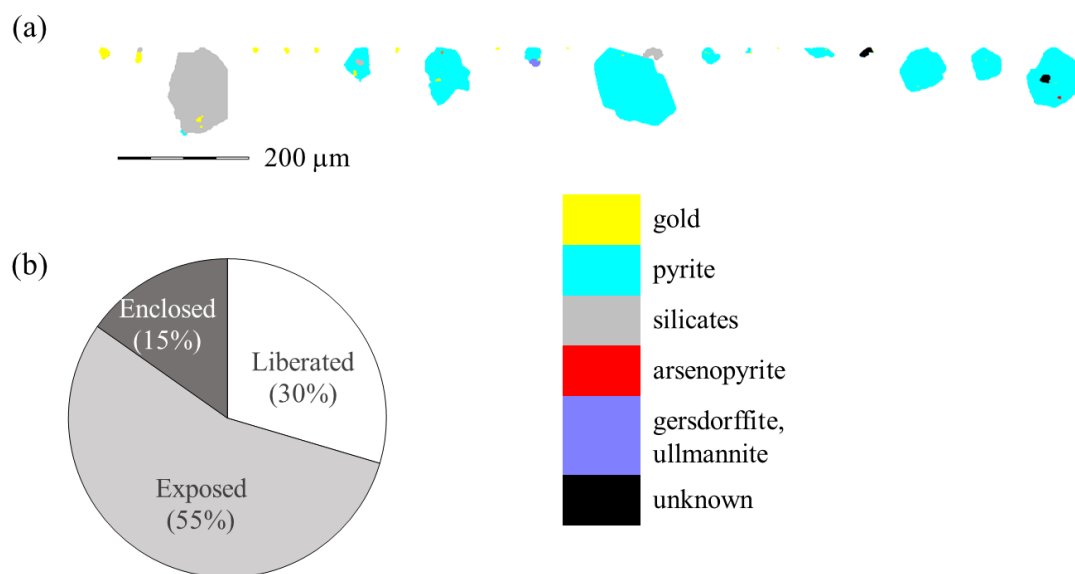

**Figure S1.** Mineral liberation analytical results for DRGO, (a) mineralogical 2D mapping of liberated Au and Au-bearing grains, (b) distributions of classified Au grains.

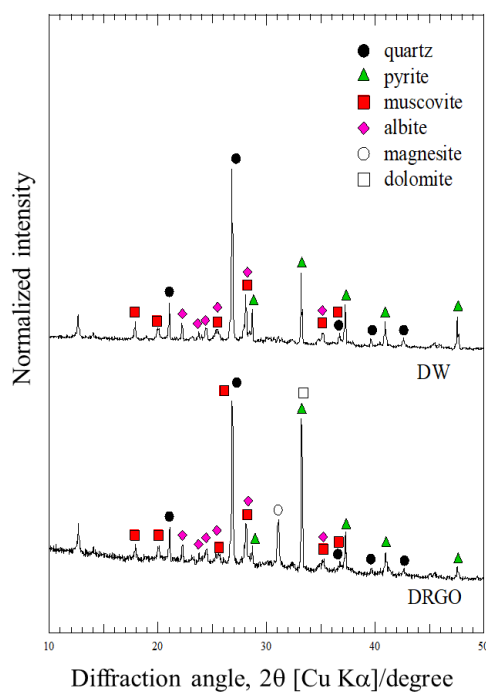

**Figure S2.** XRD patterns of DRGO and DW.
